# Supplementary material for: A natural cyanobacterial protein C-phycoerythrin as an Hg2+ selective fluorescent probe in aqueous systems
Source: Royal Society of Chemistry journal article supplement (doi:10.1039/d0nj01059f), 2020-01-01
Supplement: d0nj01059f1.pdf [file d0nj01059f1.pdf]

## Electronic Supplementary Information

### **A natural cyanobacterial protein C-phycoerythrin as an Hg<sup>2+</sup> selective fluorescence probe in aqueous systems**

Tonmoy Ghosh<sup>a,c,§</sup>, Sobhan Chatterjee<sup>b,c</sup>, Khushbu Bhayani<sup>a</sup>, Sandhya Mishra<sup>a,c,\*</sup>

<sup>a</sup>Applied Phycology and Biotechnology Division

<sup>b</sup>Salt and Marine Chemicals Division

CSIR-Central Salt & Marine Chemicals Research Institute

Gijubhai Badheka Marg, Bhavnagar 364002, Gujarat, India.

<sup>c</sup>Academy of Scientific and Innovative Research (AcSIR),

Ghaziabad 201002, India.

<sup>§</sup>Present address: Omics of Algae group, International Centre for Genetic Engineering and  
Biotechnology (ICGEB), Aruna Asaf Ali Marg, New Delhi 110067

\*Corresponding author:

Dr. Sandhya Mishra

Emeritus Scientist, Applied Phycology and Biotechnology Division,

CSIR - Central Salt & Marine Chemicals Research Institute

Gijubhai Badheka Marg, Bhavnagar 364002, Gujarat, India.

Email: [smishra@csmcri.res.in](mailto:smishra@csmcri.res.in)

## Table of contents

---

| <b>S. No.</b> | <b>Topic</b>                                                | <b>Page No.</b> |
|---------------|-------------------------------------------------------------|-----------------|
| <b>S1</b>     | Purification and characterization of CPE                    | S3              |
| <b>S2</b>     | Loss of CPE color with 7 $\mu\text{M}$ $\text{Hg}^{2+}$     | S4              |
| <b>S3</b>     | Decrease in fluorescence intensity w.r.t $[\text{Hg}^{2+}]$ | S5              |
| <b>S4</b>     | Stern Volmer curve for CPE – $\text{Hg}^{2+}$ interaction   | S6              |
| <b>S5</b>     | Fluorescence life time analysis                             | S7              |
|               | References                                                  | S8              |

---

## S1. CPE purification and characterization

The growth of the cyanobacterium *Lyngbya* sp. CCNM 2053 was carried out using previously published reports <sup>1</sup>. Briefly, fresh biomass was suspended in 0.1 M potassium phosphate buffer pH 7.0 at a solid liquid ratio of 75 mg ml<sup>-1</sup> (wet basis) and repeatedly frozen and thawed at -80 and 27 °C respectively. After 3 such cycles, the mixture was centrifuged (10,000 g, 10 °C, 10 minutes) and the supernatant was subjected to 25 % followed by 60 % ammonium sulphate precipitation. The pellet obtained after 60 % ammonium sulphate saturation was dissolved in minimal quantity of extraction buffer and extensively dialyzed against it. The partially purified CPE was further purified by ion-exchange (DEAE Sepharose, Sigma Aldrich, USA) followed by size exclusion chromatography (Sephadex S300 HR, Sigma Aldrich, USA). The pink fractions were pooled together and brought to 60 % ammonium sulphate saturation and left overnight. After centrifugation, the pellet was re-dissolved in minimum quantity of the extraction buffer and dialyzed against it overnight. CPE quantification was carried out using the following equations <sup>2</sup>:

$$\text{CPC (mg ml}^{-1}\text{)} = [\text{A}_{615} - 0.474\text{A}_{652}]/5.34$$

(1)

$$\text{APC (mg ml}^{-1}\text{)} = [\text{A}_{652} - 0.208\text{A}_{615}]/5.09$$

(2)

$$\text{CPE (mg ml}^{-1}\text{)} = [\text{A}_{562} - 2.41(\text{CPC}) - 0.849(\text{APC})]/9.62$$

(3)

The purity ratio of CPE was calculated using the  $A_{562}/A_{280}$  ratio while its characteristics were verified using UV-visible and fluorescence spectroscopy.

**S2. Loss of CPE color with 7  $\mu\text{M}$   $\text{Hg}^{2+}$**

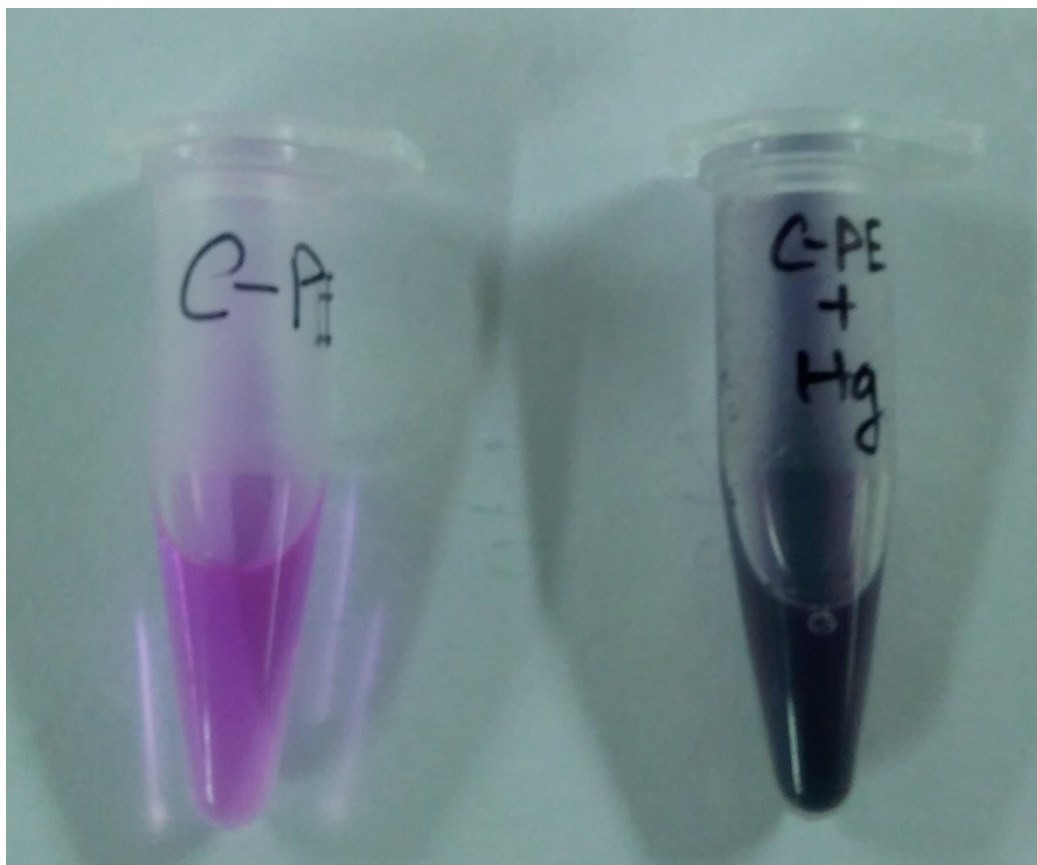

**Fig. S1.** CPE (left) before and (right) after interaction with 7  $\mu\text{M}$   $\text{Hg}^{2+}$ .

S3. Decrease in fluorescence intensity w.r.t [Hg<sup>2+</sup>]

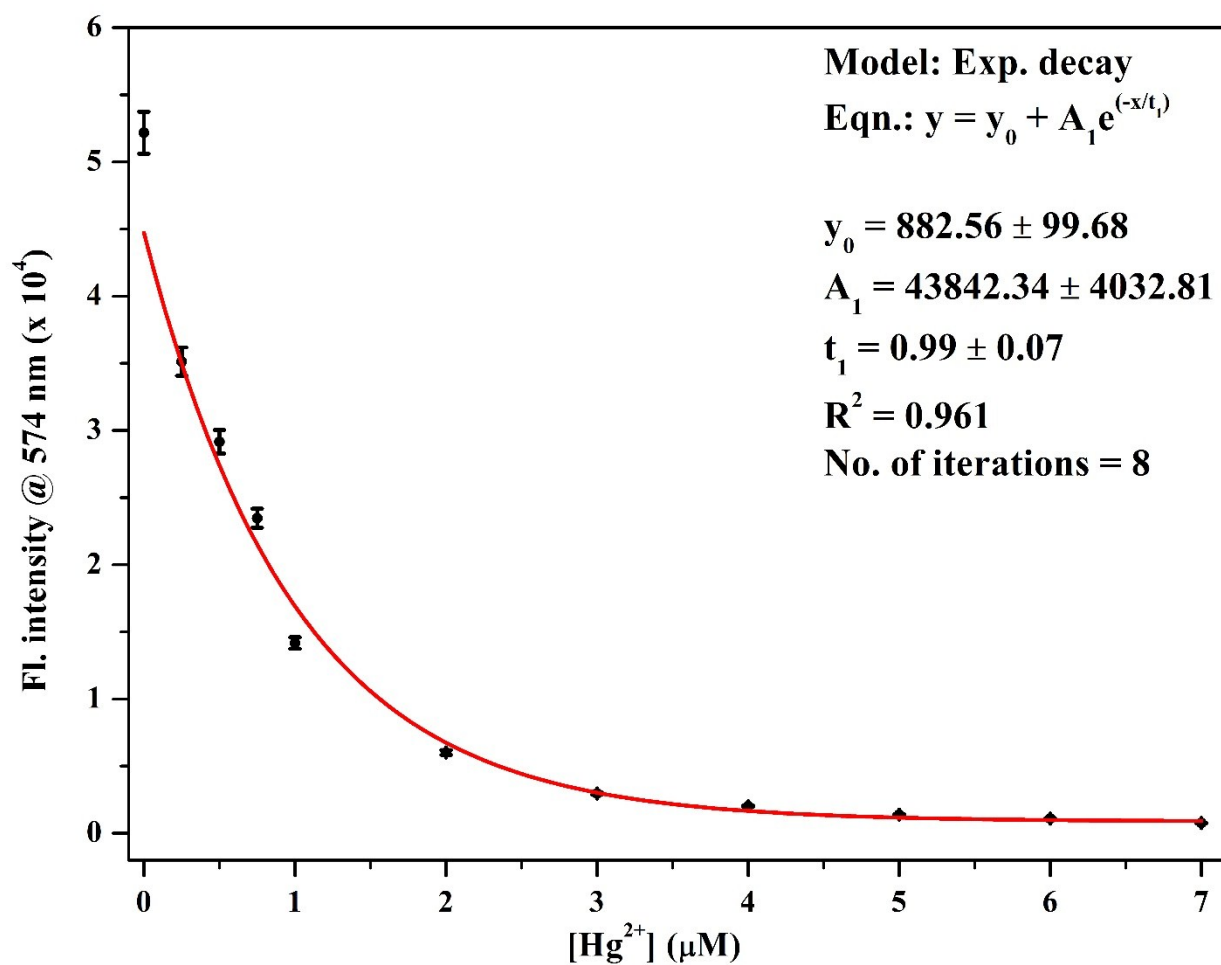

Fig. S2. Decrease in fluorescence emission of CPE under increasing [Hg<sup>2+</sup>].

S4. Stern Volmer curve for CPE – Hg<sup>2+</sup> interaction

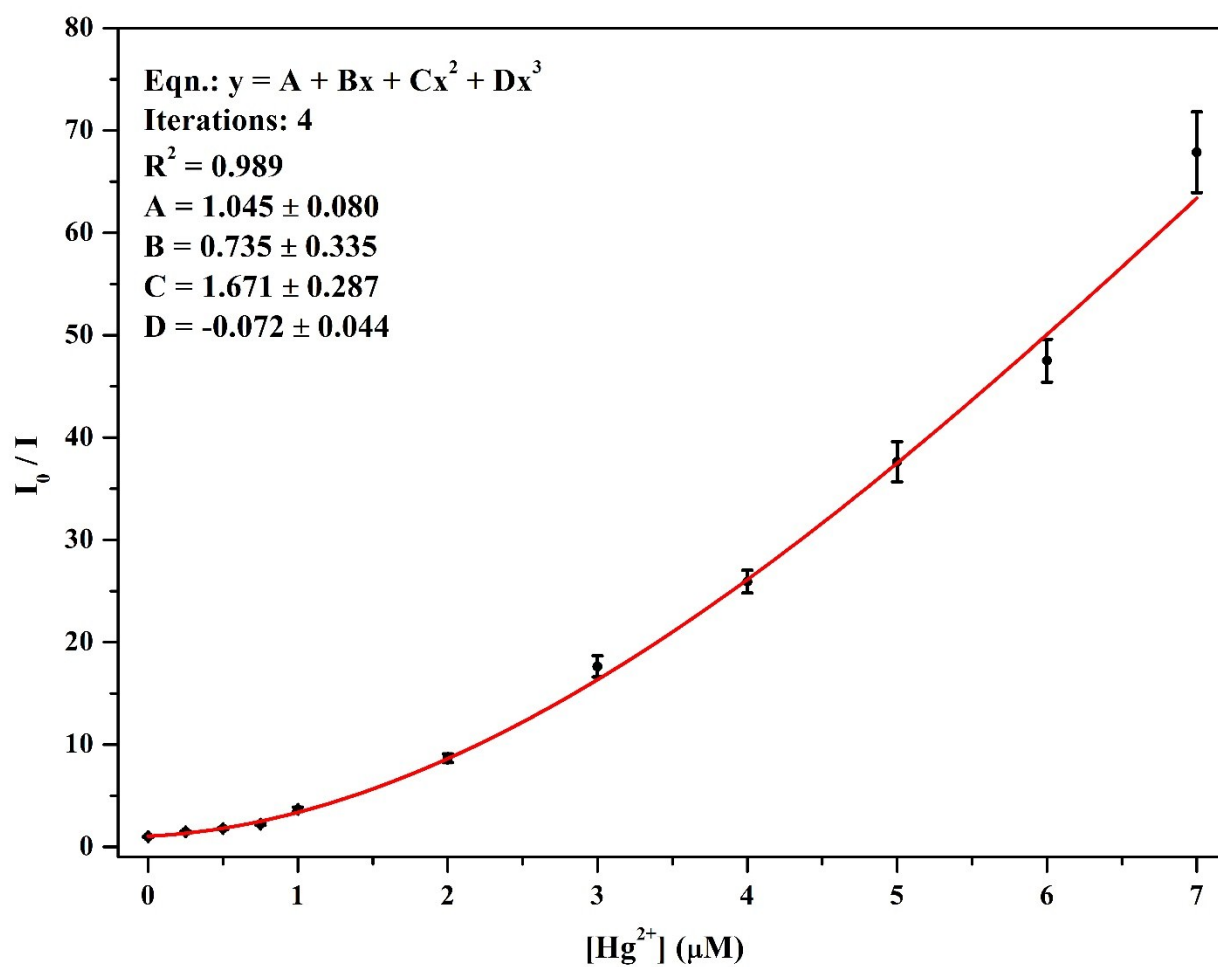

Fig. S3: Stern Volmer curve for CPE - Hg<sup>2+</sup> interaction

## S5. Fluorescence life time analysis

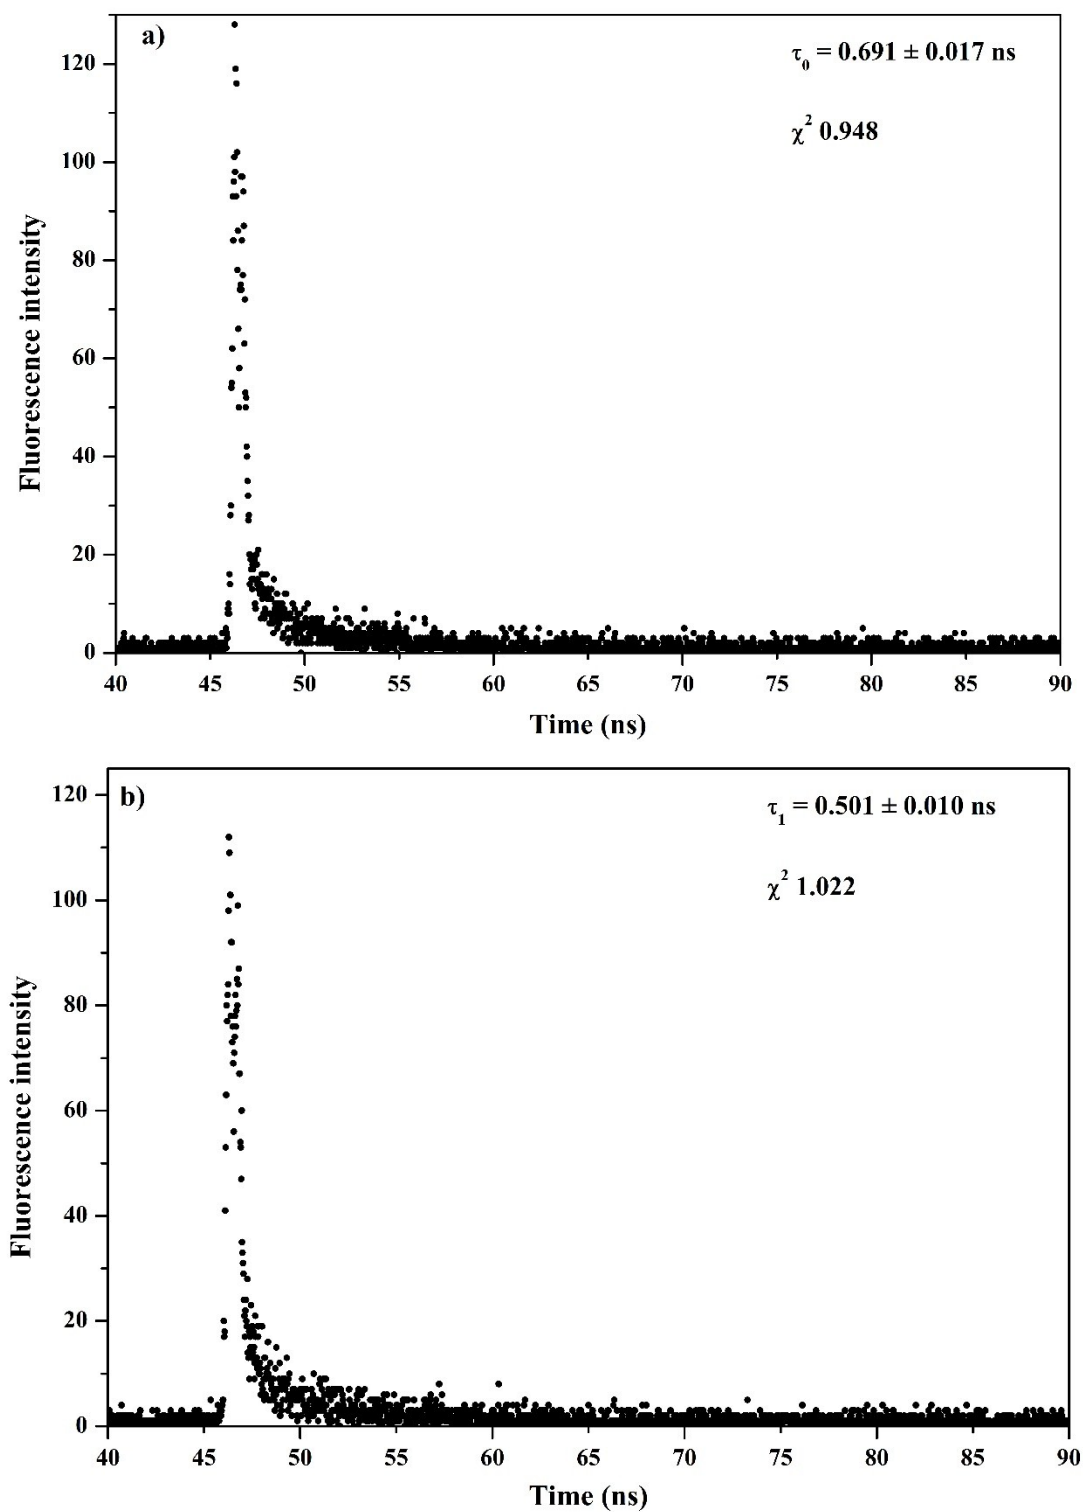

**Fig. S4.** Fluorescence lifetime of CPE in **a)** absence of  $\text{Hg}^{2+}$  and, **b)** in presence of  $3 \mu\text{M Hg}^{2+}$

## References

- 1 T. Ghosh, K. Bhayani, C. Paliwal, R. Maurya, K. Chokshi, I. Pancha and S. Mishra, *Front. Mar. Sci.*, 2016, **3**, 146.
- 2 A. Bennett and L. Bogorad, *J. Cell Biol.*, 1973, **58**, 419–435.
